# Supplementary material for: Pharmacokinetics and Pharmacodynamics Estimation of Eculizumab in a 2-Year-Old Girl With Atypical Hemolytic Uremic Syndrome: A Case Report With 4-Year Follow-Up
Source: Front Pediatr. 2019 Dec 17;7:519. doi: 10.3389/fped.2019.00519 (PMC6929516; doi:10.3389/fped.2019.00519)
Supplement: Supplementary file 1 [file Table_1.XLSX]

## Sheet: Sheet1
Supplementary Table 1: Population PK parameters used in this study
PopPK parameters for aHUS		References
CL (L/h/70kg)	0.0146	package insert
		(http://www.soliris.net/resources/pdf/soliris_pi_mg.pdf)
CV% of CL	40.2	FDA approval document for PNH
		(http://www.accessdata.fda.gov/drugsatfda_docs/nda/2007/125166s0000_PharmcometricsR.pdf)
SD	0.00587
Vd (L/kg)	0.088	package insert
CV% for Vd	16.2	FDA approval document for PNH
SD	0.014
Assay error
proportional error	0.0329	Our data (Jodele et al, BBMT, 22: 307-315, 2016)
CL; systemic clearance, Vd; volume of distribution
MW-Pharm 3.82 software was used for analysis
